# Supplementary material for: Insight into the Inhibitory Mechanism of Aryl Formyl Piperidine Derivatives on Monoacylglycerol Lipase through Molecular Dynamics Simulations
Source: MDPI journal article supplement (doi:10.3390/molecules27217512), 2022-11-03
Supplement: s1 [file s1]

# Insight into the inhibitory mechanism of Aryl Formyl Piperidine derivatives on Monoacylglycerol Lipase through Molecular Dynamics Simulations

Chang Liu <sup>1</sup>, Shanshan Guan <sup>2,3</sup>, Jingwen E <sup>1</sup>, Zhijie Yang <sup>1</sup>, Xinyue Zhang <sup>1</sup>, Jianan Ju <sup>1</sup>, Song Wang <sup>1,\*</sup> and Hao Zhang <sup>1,\*</sup>

<sup>1</sup> Laboratory of Theoretical and Computational Chemistry, Institute of Theoretical Chemistry, College of Chemistry, Jilin University, Changchun 130023, China

<sup>2</sup> College of Biology and Food Engineering, Jilin Engineering Normal University, Changchun 130052, China

<sup>3</sup> Key Laboratory of Molecular Nutrition at Universities of Jilin Province, Changchun 130052, China

\* Correspondence: ws@jlu.edu.cn (S.W.); stringbell@jlu.edu.cn (H.Z.); Tel.: +86-0431-88498761 (S.W. & H.Z.)

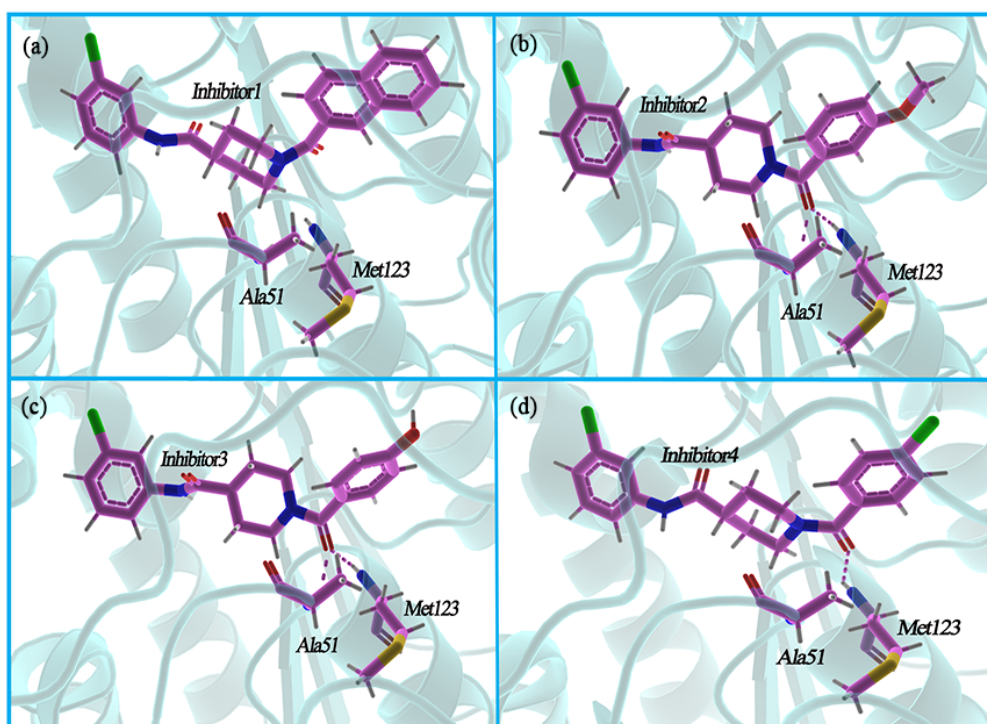

**Figure S1.** A diagram of the initial conformational patterns of the four complexes obtained by docking, (a) Complex 1, (b) Complex 2, (c) Complex 3, (d) Complex 4.

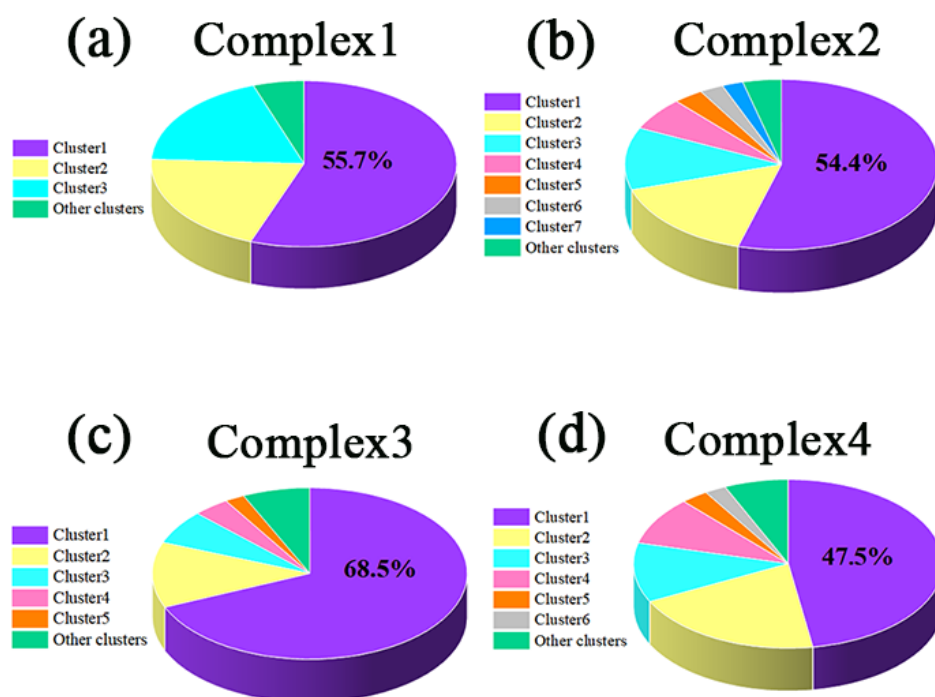

**Figure S2.** The results of the RMSD-based clustering of the four complexes are shown in the figure, with each complex obtaining its corresponding representative clusters and the "other clusters" being representative clusters that have less than 2% of the capacity.

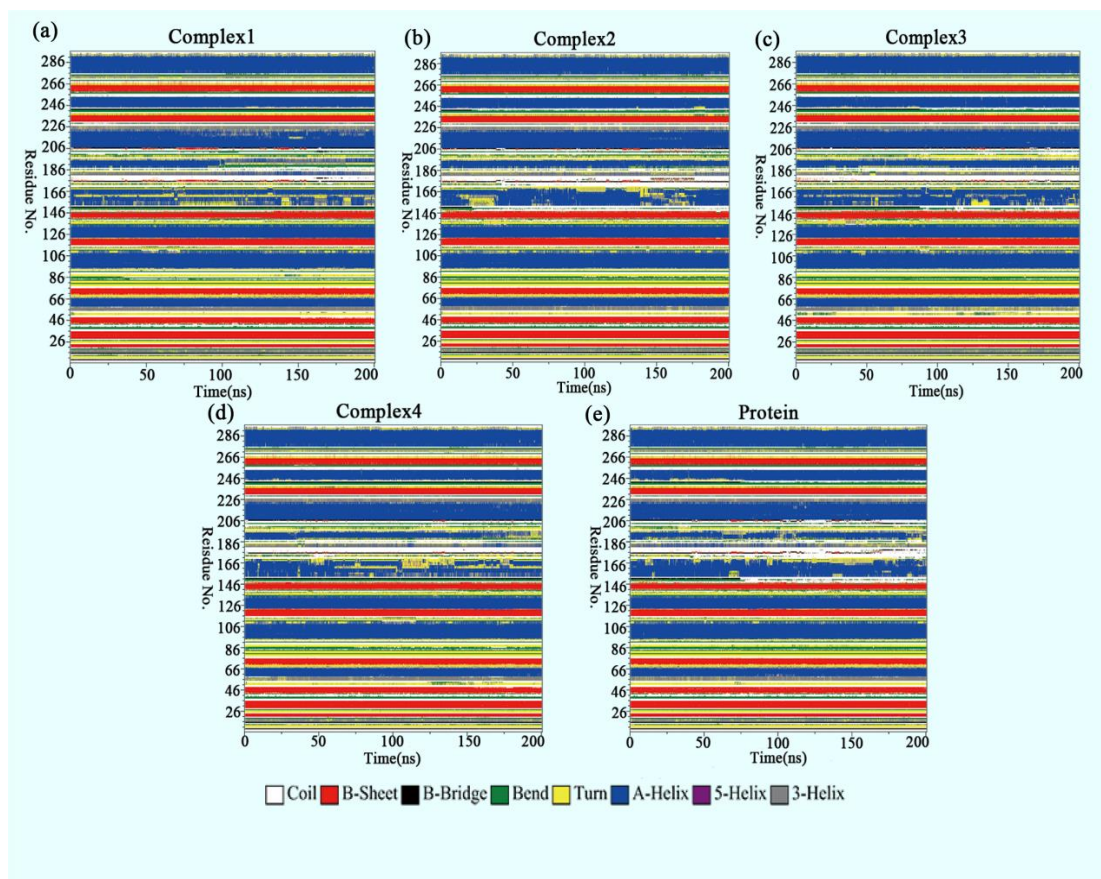

**Figure S3.** The plot of the whole secondary structure species of the four complexes and the protein with simulation time.

**Table S1.** The percentages of the first five eigenvectors of the four complexes.

| Systems  | PC1   | PC2   | PC3  | PC4  | PC5   | Total |
|----------|-------|-------|------|------|-------|-------|
| Complex1 | 25.2% | 11.1% | 7.0% | 4.3% | 10.3% | 57.9% |
| Complex2 | 22.9% | 12.8% | 7.3% | 4.1% | 10.9% | 58.0% |
| Complex3 | 16.8% | 13.4% | 7.4% | 4.6% | 12.6% | 54.8% |
| Complex4 | 22.5% | 13.3% | 8.2% | 5.2% | 11.0% | 60.2% |

**Table S2.** The various decomposition energies of the important residues in the four complexes (kJ·mol<sup>-1</sup>).

| Residues | Complex1             | Complex2 | Complex3 | Complex4 |
|----------|----------------------|----------|----------|----------|
| Gly50    | -4.5096 <sup>a</sup> | -9.6398  | -9.9206  | -2.3282  |
|          | 3.9624 <sup>b</sup>  | 4.1893   | 4.6423   | 1.3702   |
|          | -0.0540 <sup>c</sup> | -0.0389  | -0.0563  | -0.0095  |
|          | -0.6027 <sup>d</sup> | -5.4894  | -5.3370  | -0.9684  |
| Ala51    | -14.2399             | -16.0677 | -16.6692 | -5.8165  |
|          | 13.0334              | 11.5887  | 11.8617  | 7.6964   |
|          | -0.5967              | -0.5691  | -0.7097  | -0.3685  |
|          | -1.8033              | -5.0454  | -5.5175  | 1.5163   |
| Glu53    | -32.3265             | -34.2925 | -21.4421 | 4.0425   |
|          | 41.2708              | 42.1167  | 35.9210  | 3.8122   |
|          | -0.5069              | -0.4377  | -0.3528  | -0.0755  |
|          | 8.4268               | 7.3743   | 14.1181  | 7.7922   |
| Ser122   | -18.9881             | -11.1333 | -11.9032 | -3.8783  |
|          | 11.3517              | 7.7205   | 7.0439   | 4.9793   |
|          | -0.2698              | -0.4522  | -0.4570  | -0.1786  |
|          | -7.9111              | -3.8577  | -5.3147  | 0.9229   |
| Met123   | -12.1313             | -12.1920 | -14.5132 | -2.5306  |
|          | 4.5824               | 4.7105   | 4.9351   | 2.0820   |
|          | -0.0435              | -0.1036  | -0.1205  | -0.0425  |
|          | -7.5908              | -7.5904  | -9.7019  | -0.4924  |
| Ser155   | -4.7892              | 0.4058   | -0.2051  | -4.4302  |
|          | 6.7868               | -0.2715  | 0.4622   | 3.6556   |
|          | -0.2302              | -0.0339  | -0.0647  | -0.1329  |
|          | 1.7672               | 0.1004   | 0.1920   | -0.9096  |
| Ile179   | -1.7921              | -1.2348  | -2.1505  | -3.5604  |
|          | 0.3510               | 0.0132   | -0.1957  | 1.4116   |
|          | -0.0209              | -0.2416  | -0.5795  | -0.3671  |
|          | -1.4618              | -1.4659  | -2.9276  | -2.5138  |
| Ser181   | -1.0483              | -2.9446  | -6.8193  | -4.2465  |
|          | 1.2266               | 3.4855   | 3.8107   | 3.2641   |
|          | -0.0692              | -0.1588  | -0.1808  | -0.1717  |
|          | 0.1074               | 0.3838   | -3.1917  | -1.1514  |
| Leu184   | -6.6556              | -4.9022  | -6.3498  | -2.7562  |
|          | 0.4401               | 0.7352   | 0.8384   | -0.2558  |
|          | -0.3767              | -0.3838  | -0.4904  | -0.3527  |
|          | -6.5920              | -4.5502  | -6.0014  | -3.3643  |
| Glu190   | -5.1072              | -1.6855  | 0.6049   | 1.6572   |
|          | 4.6991               | 3.1748   | 2.5685   | 1.1958   |
|          | -0.1103              | -0.0657  | -0.0988  | -0.0642  |

|        |          |          |          |          |
|--------|----------|----------|----------|----------|
|        | -0.5189  | 1.4289   | 3.0747   | 2.7899   |
| Val191 | -2.5694  | -2.0690  | -2.0039  | -1.9634  |
|        | 0.9545   | 0.8746   | 0.6006   | 0.5774   |
|        | -0.0904  | -0.0994  | -0.1061  | -0.1592  |
|        | -1.7028  | -1.2950  | -1.5110  | -1.5430  |
| Tyr194 | -12.0189 | -14.0364 | -17.6955 | -7.3541  |
|        | 6.2679   | 8.2303   | 9.6291   | 4.9009   |
|        | -0.8757  | -1.0501  | -1.1365  | -0.9373  |
|        | -6.6294  | -6.8613  | -9.2035  | -3.3842  |
| Asp197 | -5.0952  | -0.6685  | 1.2170   | -0.6643  |
|        | 3.2962   | 1.1557   | 0.4084   | 0.9553   |
|        | 0.0002   | 0.0006   | 0.0000   | -0.0008  |
|        | -1.7977  | 0.4862   | 1.6243   | 0.2916   |
| Leu205 | -1.3405  | -3.7223  | -1.8572  | -4.4476  |
|        | -0.1636  | -0.0461  | -0.2341  | 0.3072   |
|        | -0.3953  | -0.5987  | -0.4126  | -0.4852  |
|        | -1.9001  | -4.3660  | -2.5040  | -4.6279  |
| Leu213 | -4.9730  | -2.7714  | -3.6157  | -2.4997  |
|        | 0.2927   | 0.1268   | 0.2246   | 0.2716   |
|        | -0.4793  | -0.3252  | -0.4528  | -0.2283  |
|        | -5.1605  | -2.9704  | -3.8434  | -2.4593  |
| Asp239 | 6.1861   | -0.0979  | -4.4447  | 2.4919   |
|        | -5.8245  | -2.3503  | -2.5186  | -3.0454  |
|        | 0.0004   | 0.0004   | 0.0000   | 0.0001   |
|        | 0.3575   | -2.4502  | -6.9640  | -0.5526  |
| Leu241 | -11.1951 | -8.5101  | -5.2921  | -7.0123  |
|        | 4.4685   | 4.3976   | 1.0552   | 2.6352   |
|        | -0.8278  | -1.1393  | -0.8066  | -0.6989  |
|        | -7.5579  | -5.2549  | -5.0399  | -5.0822  |
| His269 | -25.4018 | -3.1805  | 7.0066   | -11.3696 |
|        | 26.7227  | 14.4599  | 16.4347  | 14.0516  |
|        | -0.1303  | -0.0409  | -0.0975  | -0.0323  |
|        | 1.2032   | 11.2382  | 23.3346  | 2.6477   |
| Val270 | -5.5963  | -6.0451  | -4.7169  | -4.5508  |
|        | 0.3910   | 0.4089   | 0.1763   | 0.5846   |
|        | -0.5290  | -0.6817  | -0.7396  | -0.4795  |
|        | -5.7358  | -6.3203  | -5.2817  | -4.4466  |
| Lys273 | 0.8941   | -0.2677  | -3.7450  | -7.3273  |
|        | 2.7429   | 1.1238   | 3.3418   | 5.5281   |
|        | -0.2031  | -0.3149  | -0.1260  | -0.1850  |
|        | 3.4319   | 0.5412   | -0.5295  | -1.9815  |

(a: $\Delta E_{MM}$  b: $\Delta G_{polar}$  c: $\Delta G_{nonpolar}$  d: $\Delta G_{binding}$ )
